# Supplementary material for: In vitro evaluation of cell viability and expression profile of growth factors in mouse Sertoli cells exposed to Delta-9-tetrahydrocannabinol: a mechanistic insight into the cannabinoid-induced testicular toxicity
Source: Springer Nature journal article supplement (doi:10.1186/s40360-023-00704-8), 2023-11-09

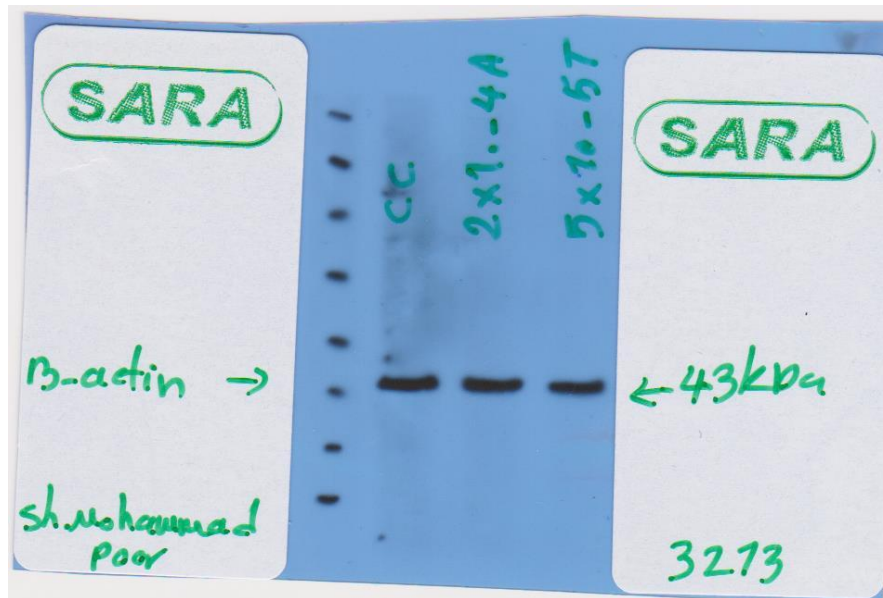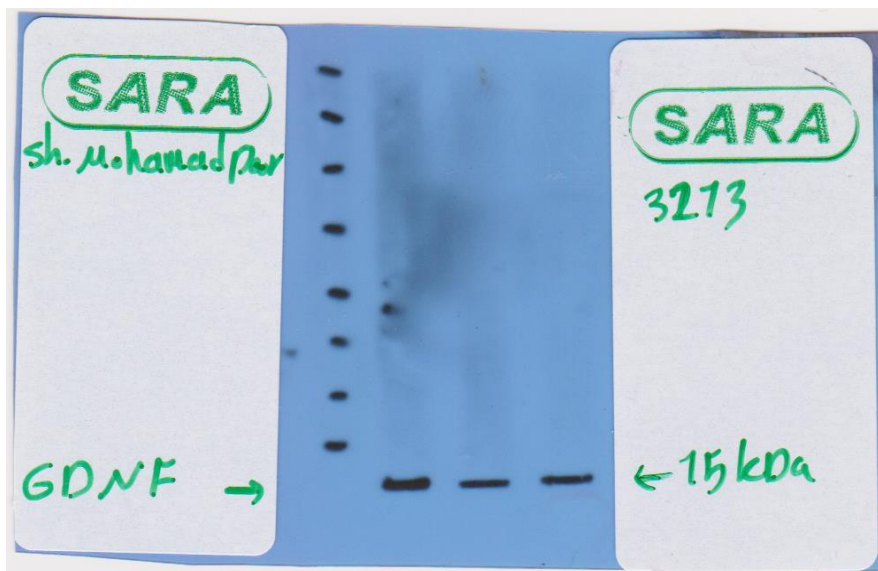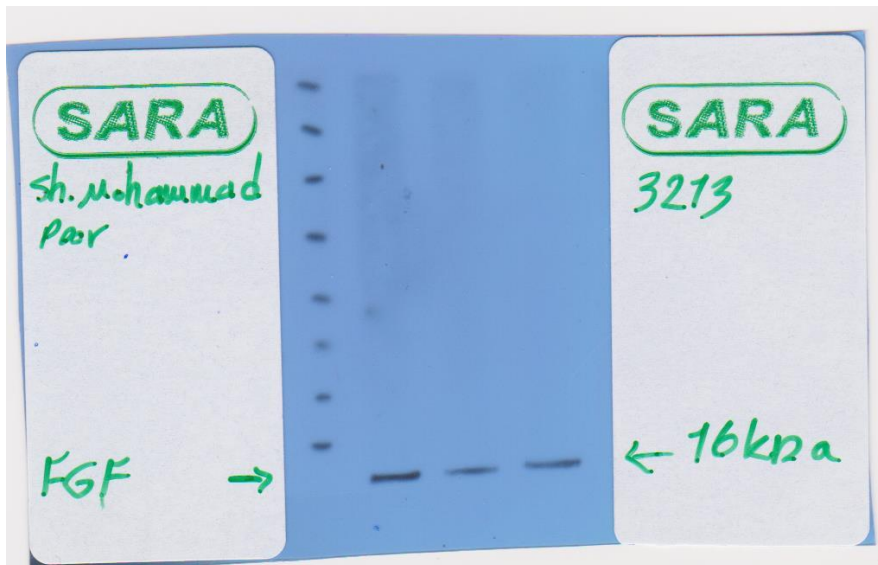

Supplement: MOESM3 [file 40360_2023_704_MOESM3_ESM.pdf]
